Figure S3

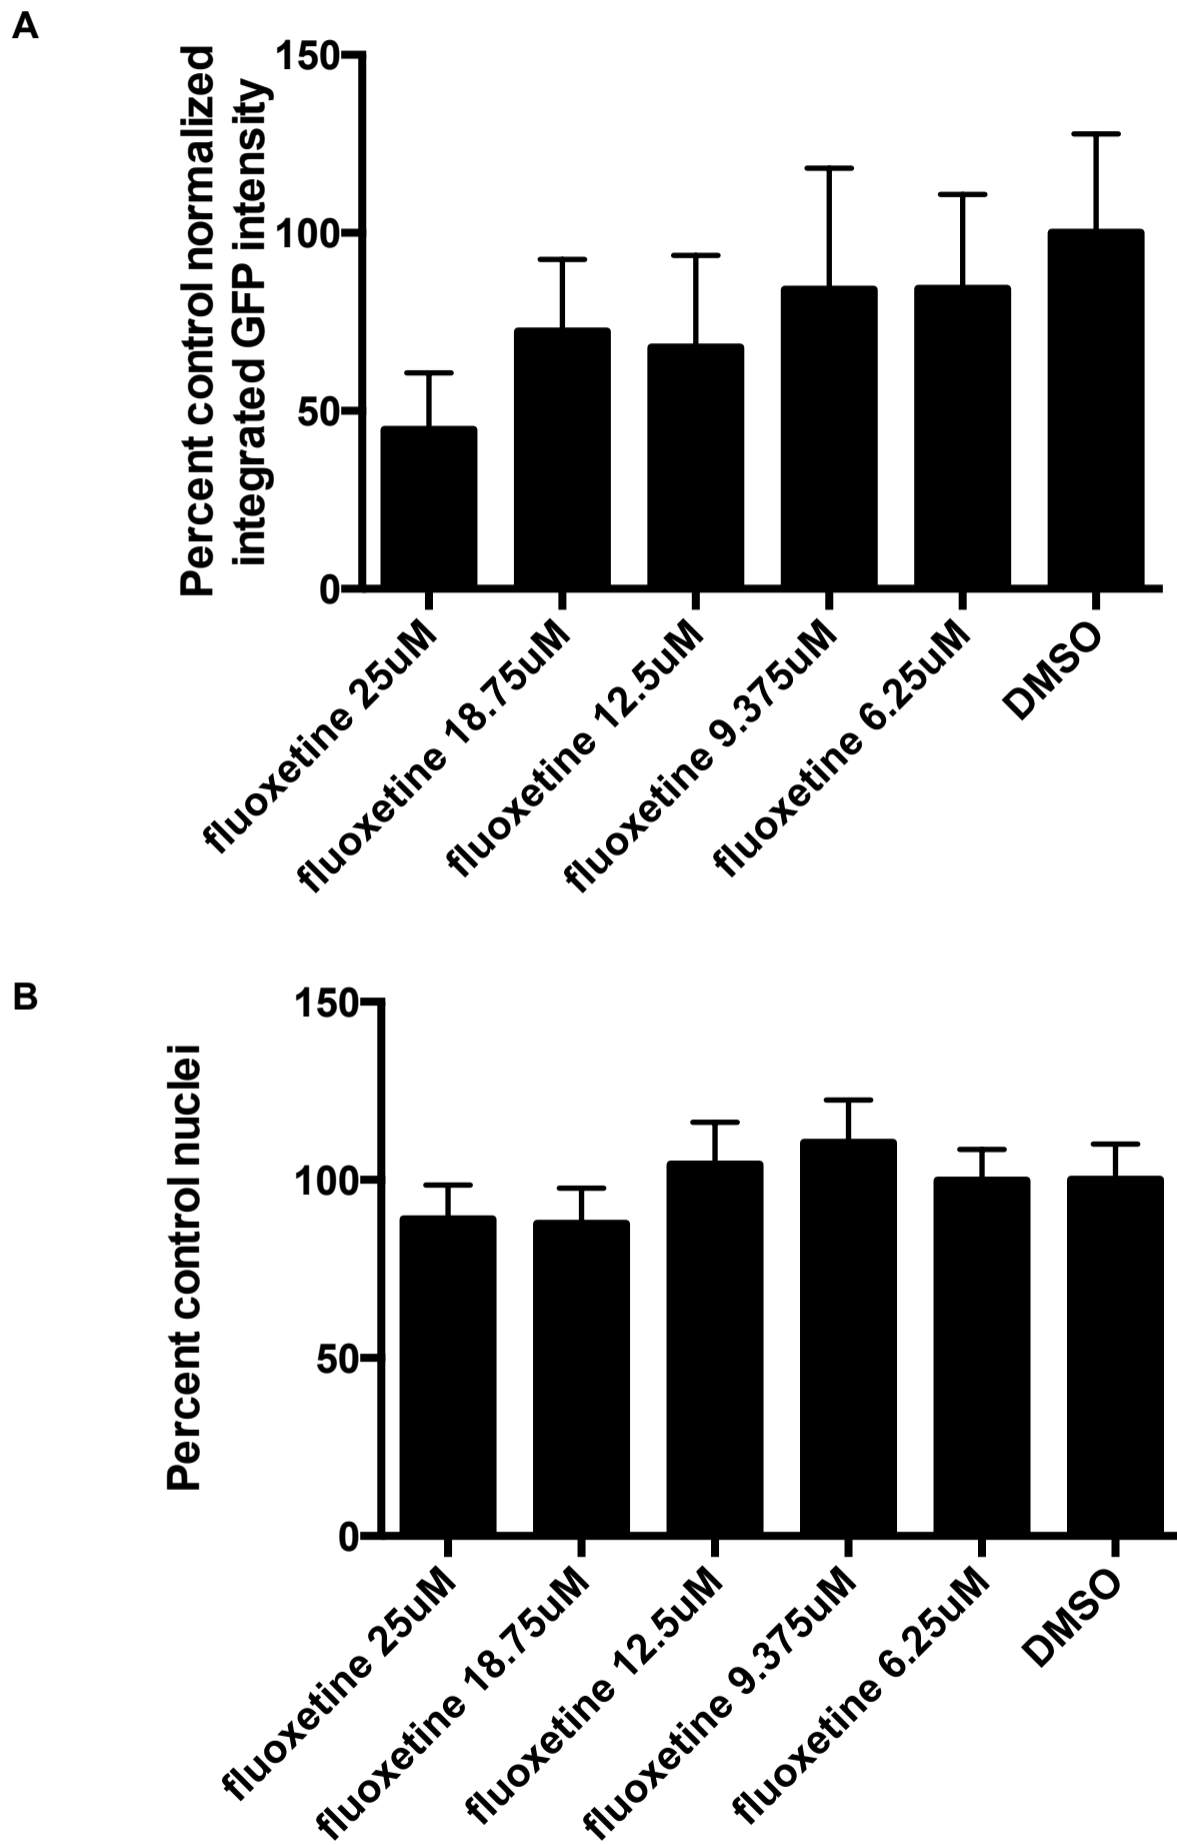

Source: https://storage.googleapis.com/plos-corpus-prod/10.1371/journal.ppat.1003946/1/ppat.1003946.s003.pdf
