# Supplementary material for: Identification of Host-Targeted Small Molecules That Restrict Intracellular Mycobacterium tuberculosis Growth
Source: PLOS journal article supplement (doi:10.1371/journal.ppat.1003946), 2014-02-20

Figure S1A

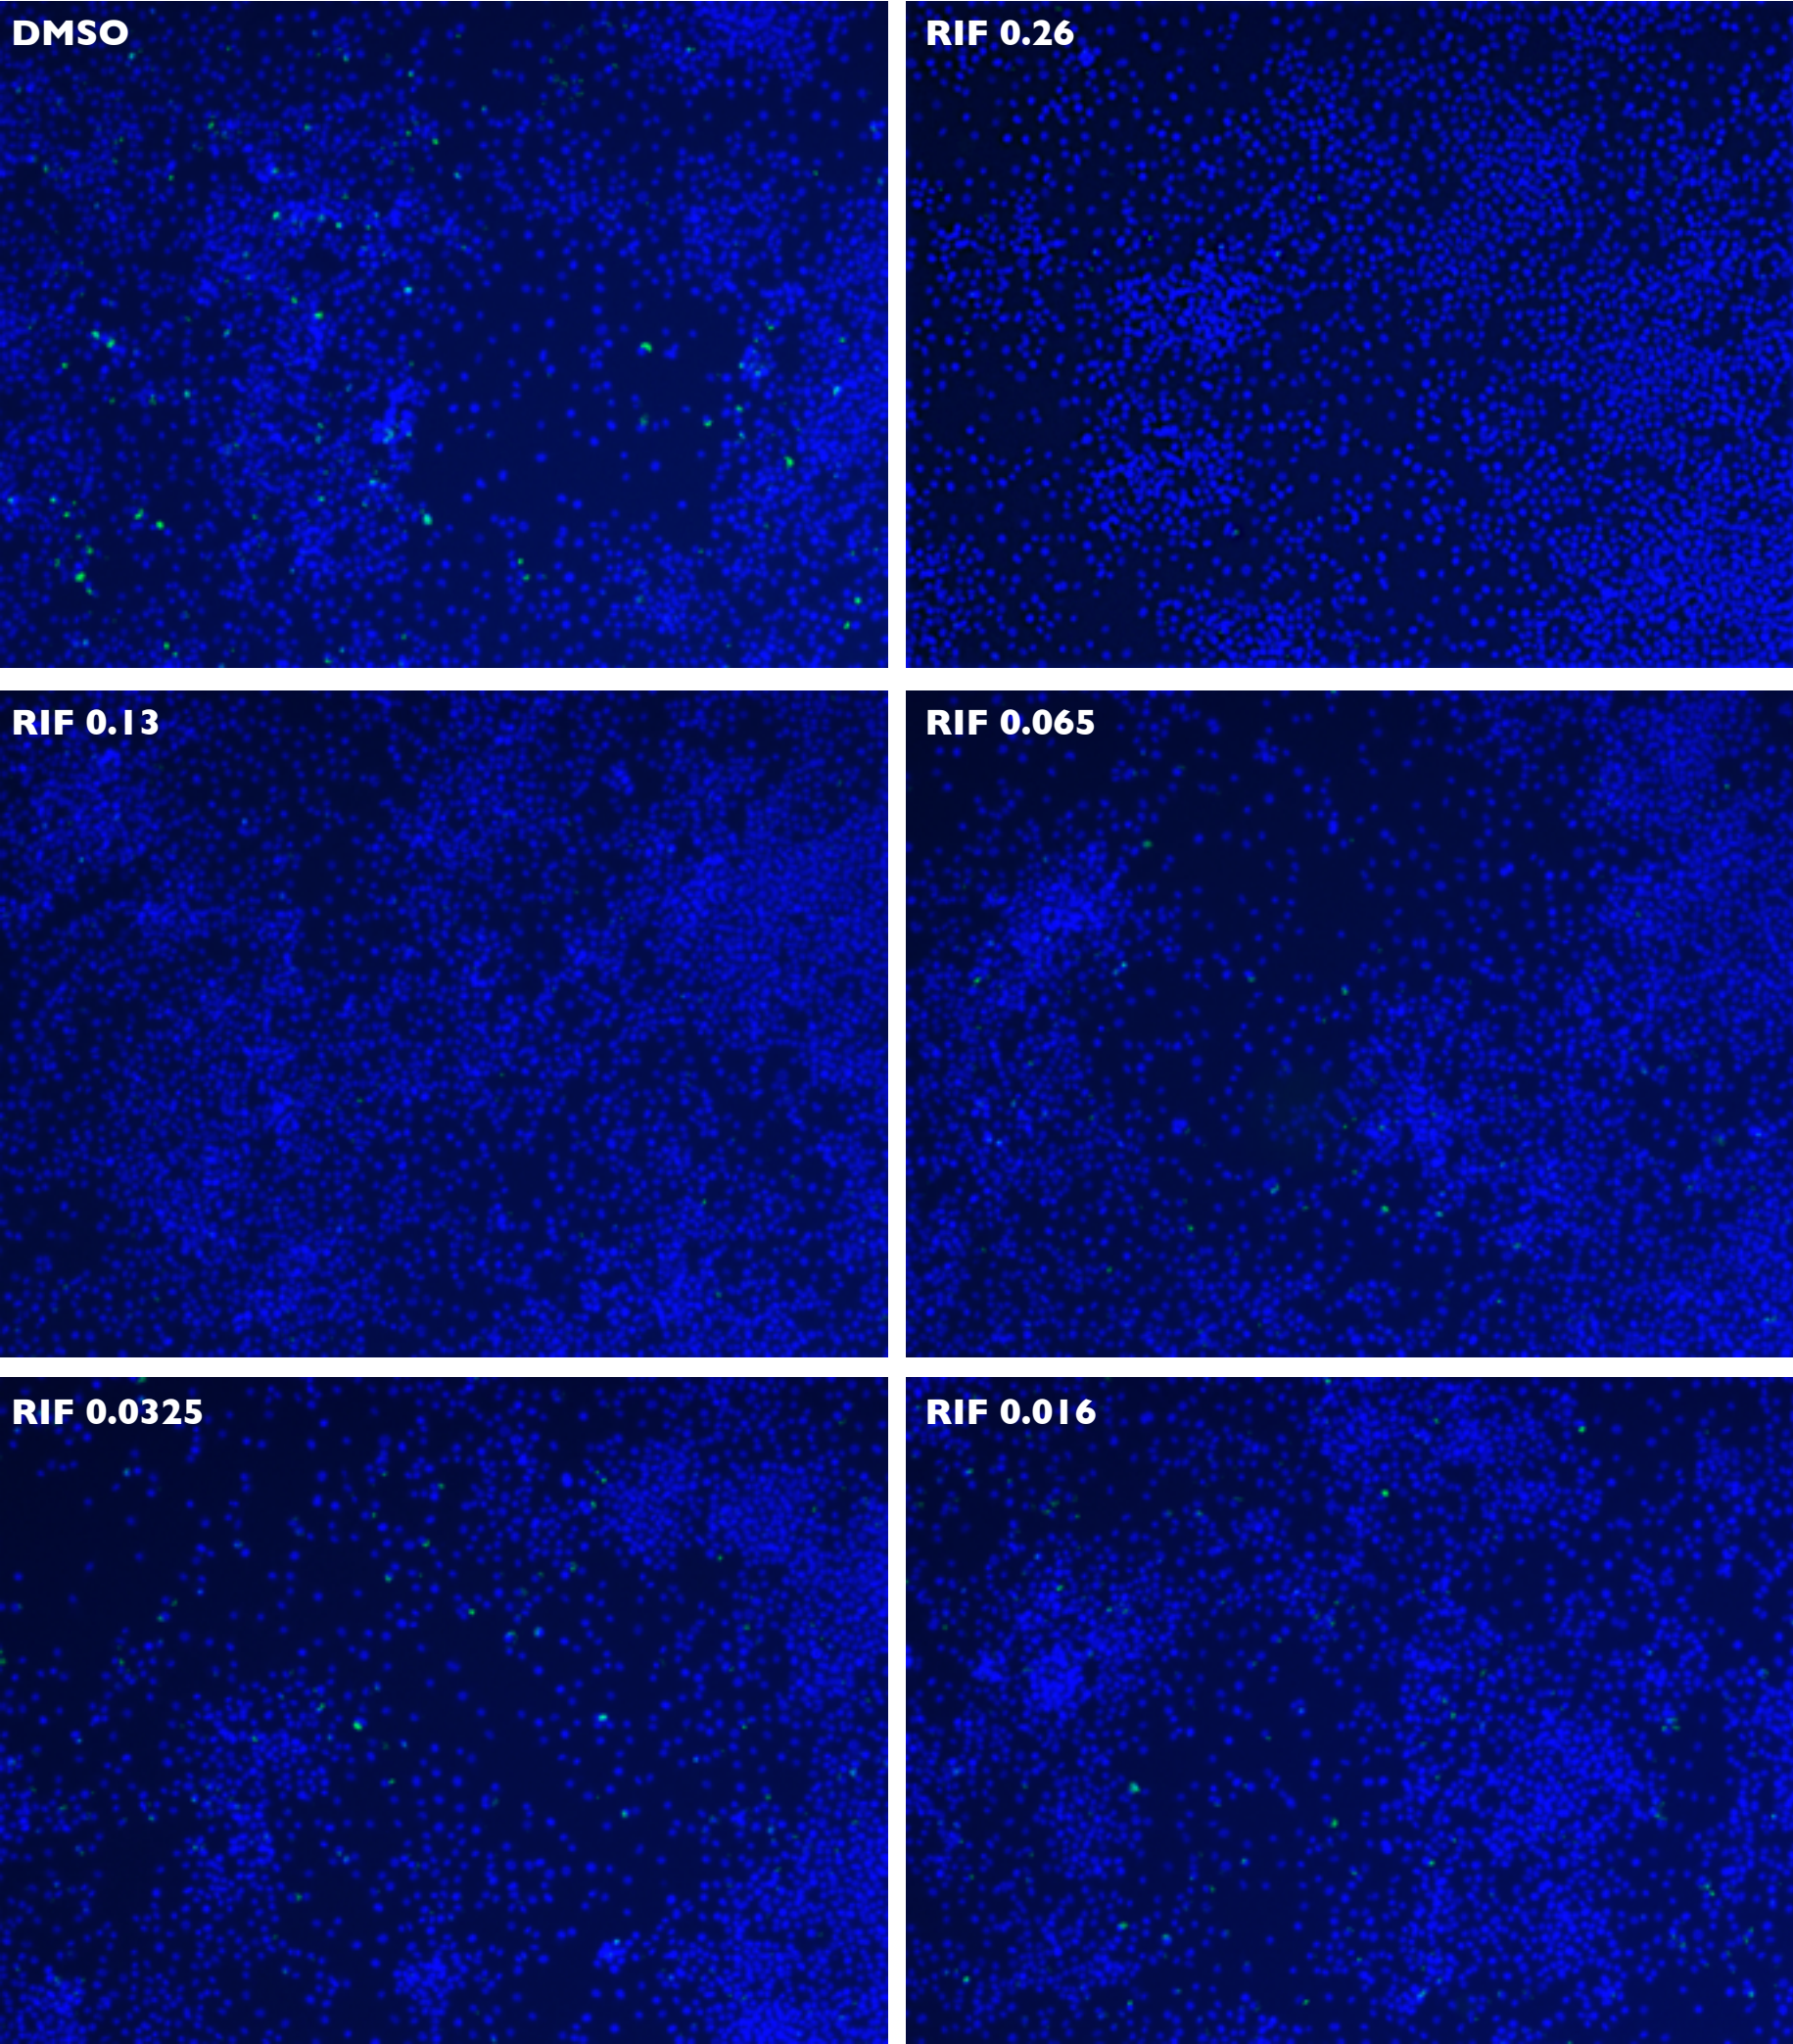

Figure S1B

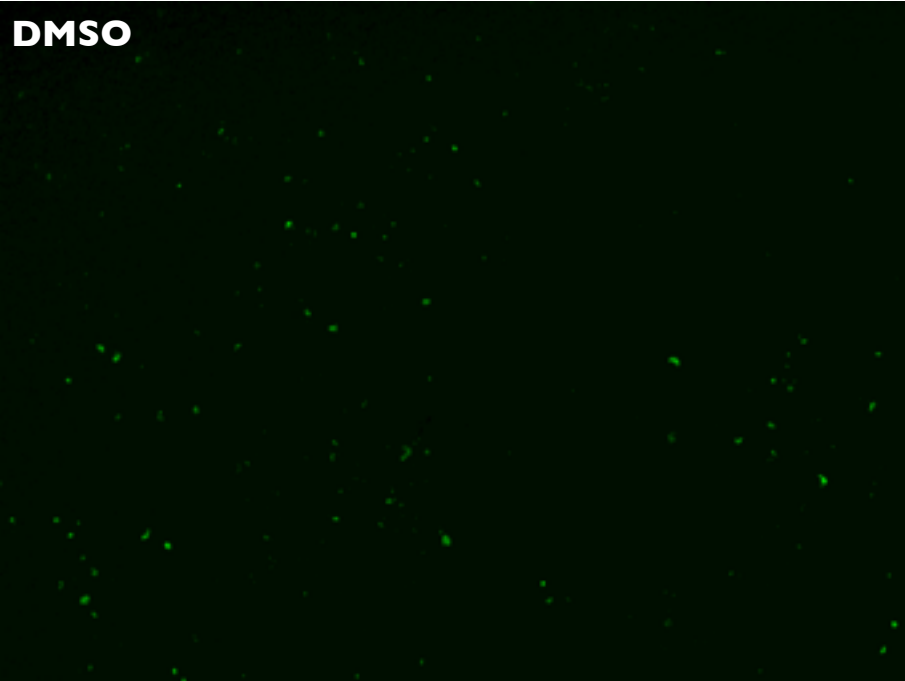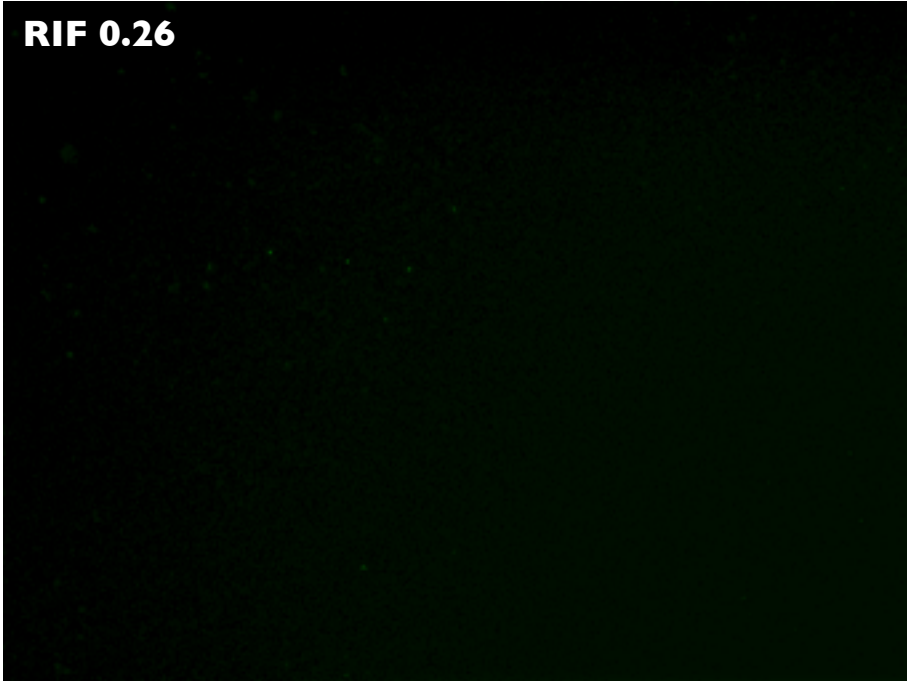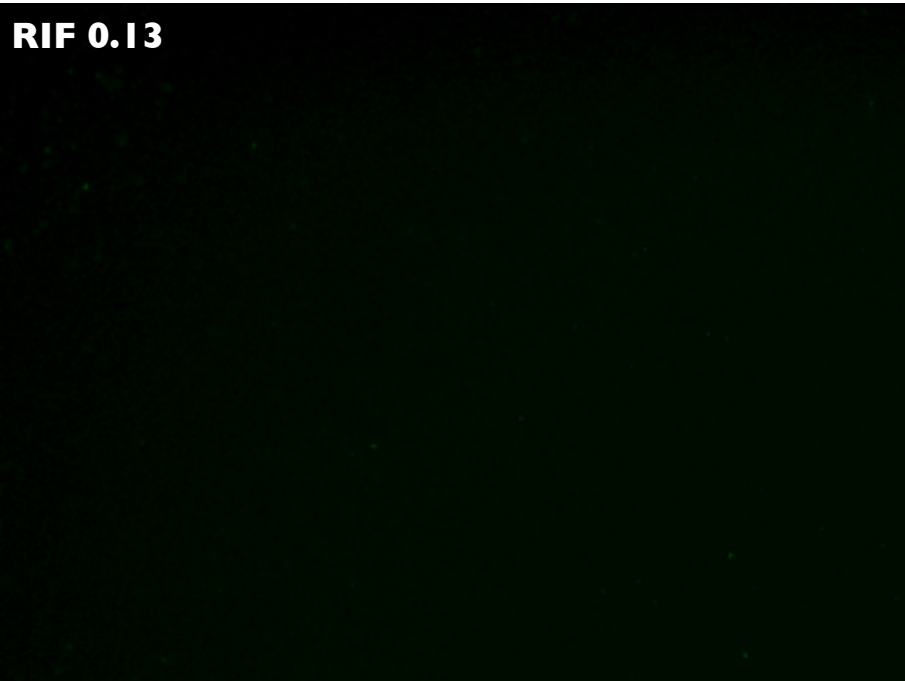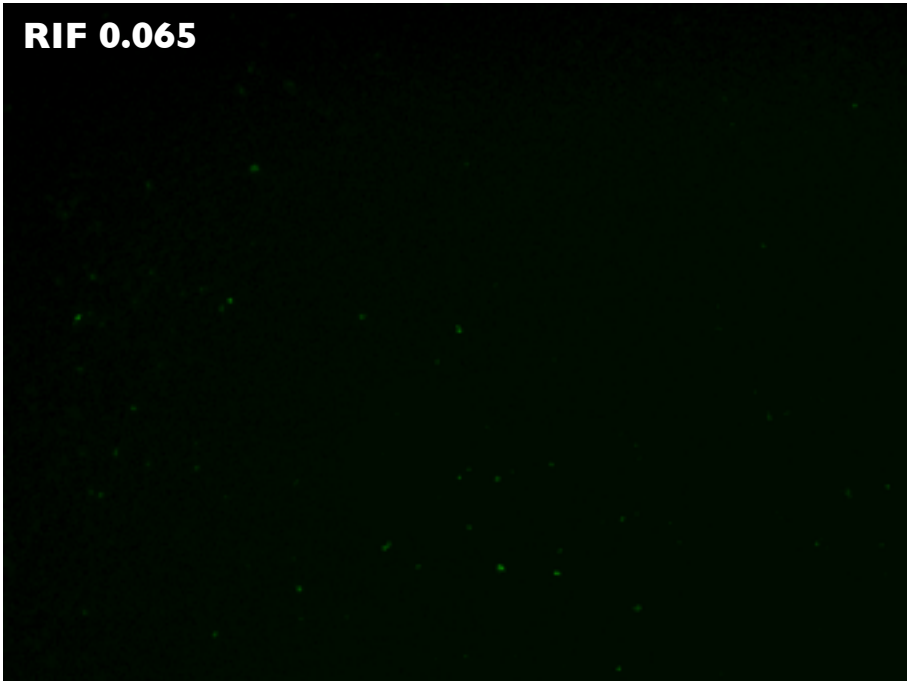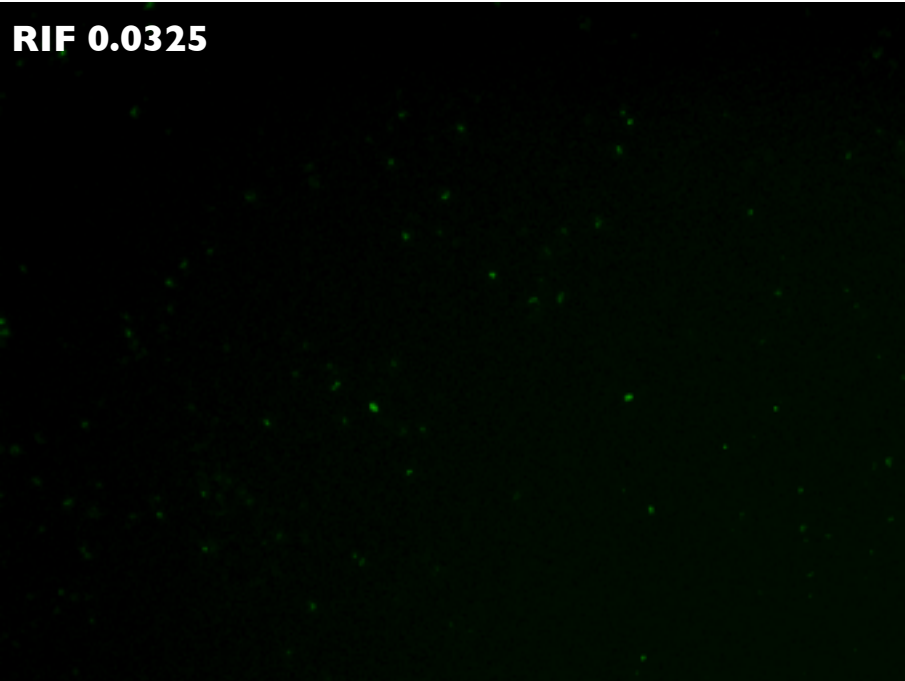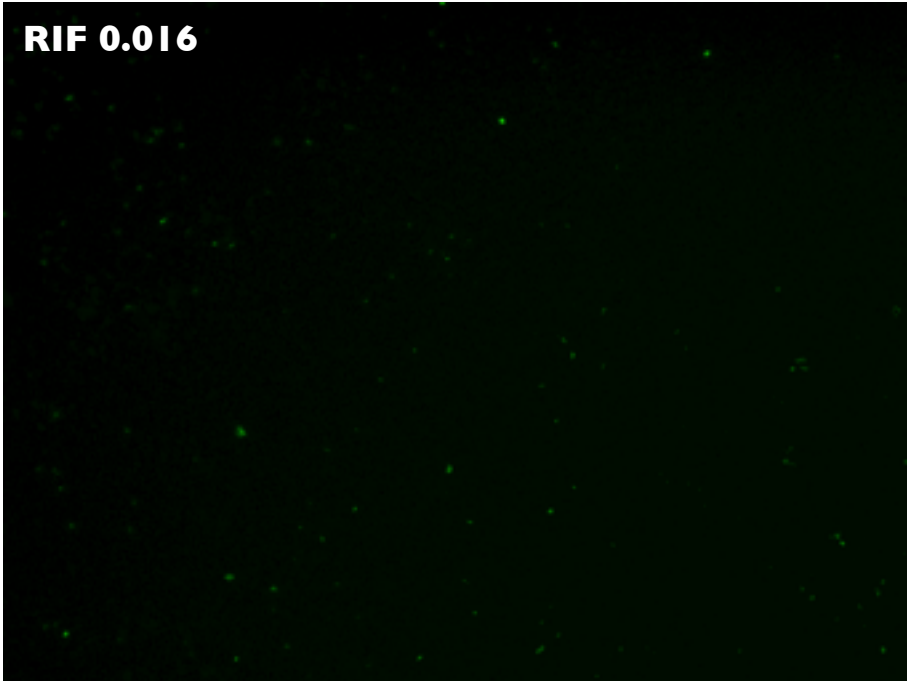

Supplement: S1 (10.1371/journal.ppat.1003946.s001) [file journal.ppat.1003946.s001]
