# Supplementary material for: Identification of Host-Targeted Small Molecules That Restrict Intracellular Mycobacterium tuberculosis Growth
Source: PLOS journal article supplement (doi:10.1371/journal.ppat.1003946), 2014-02-20

Figure S6

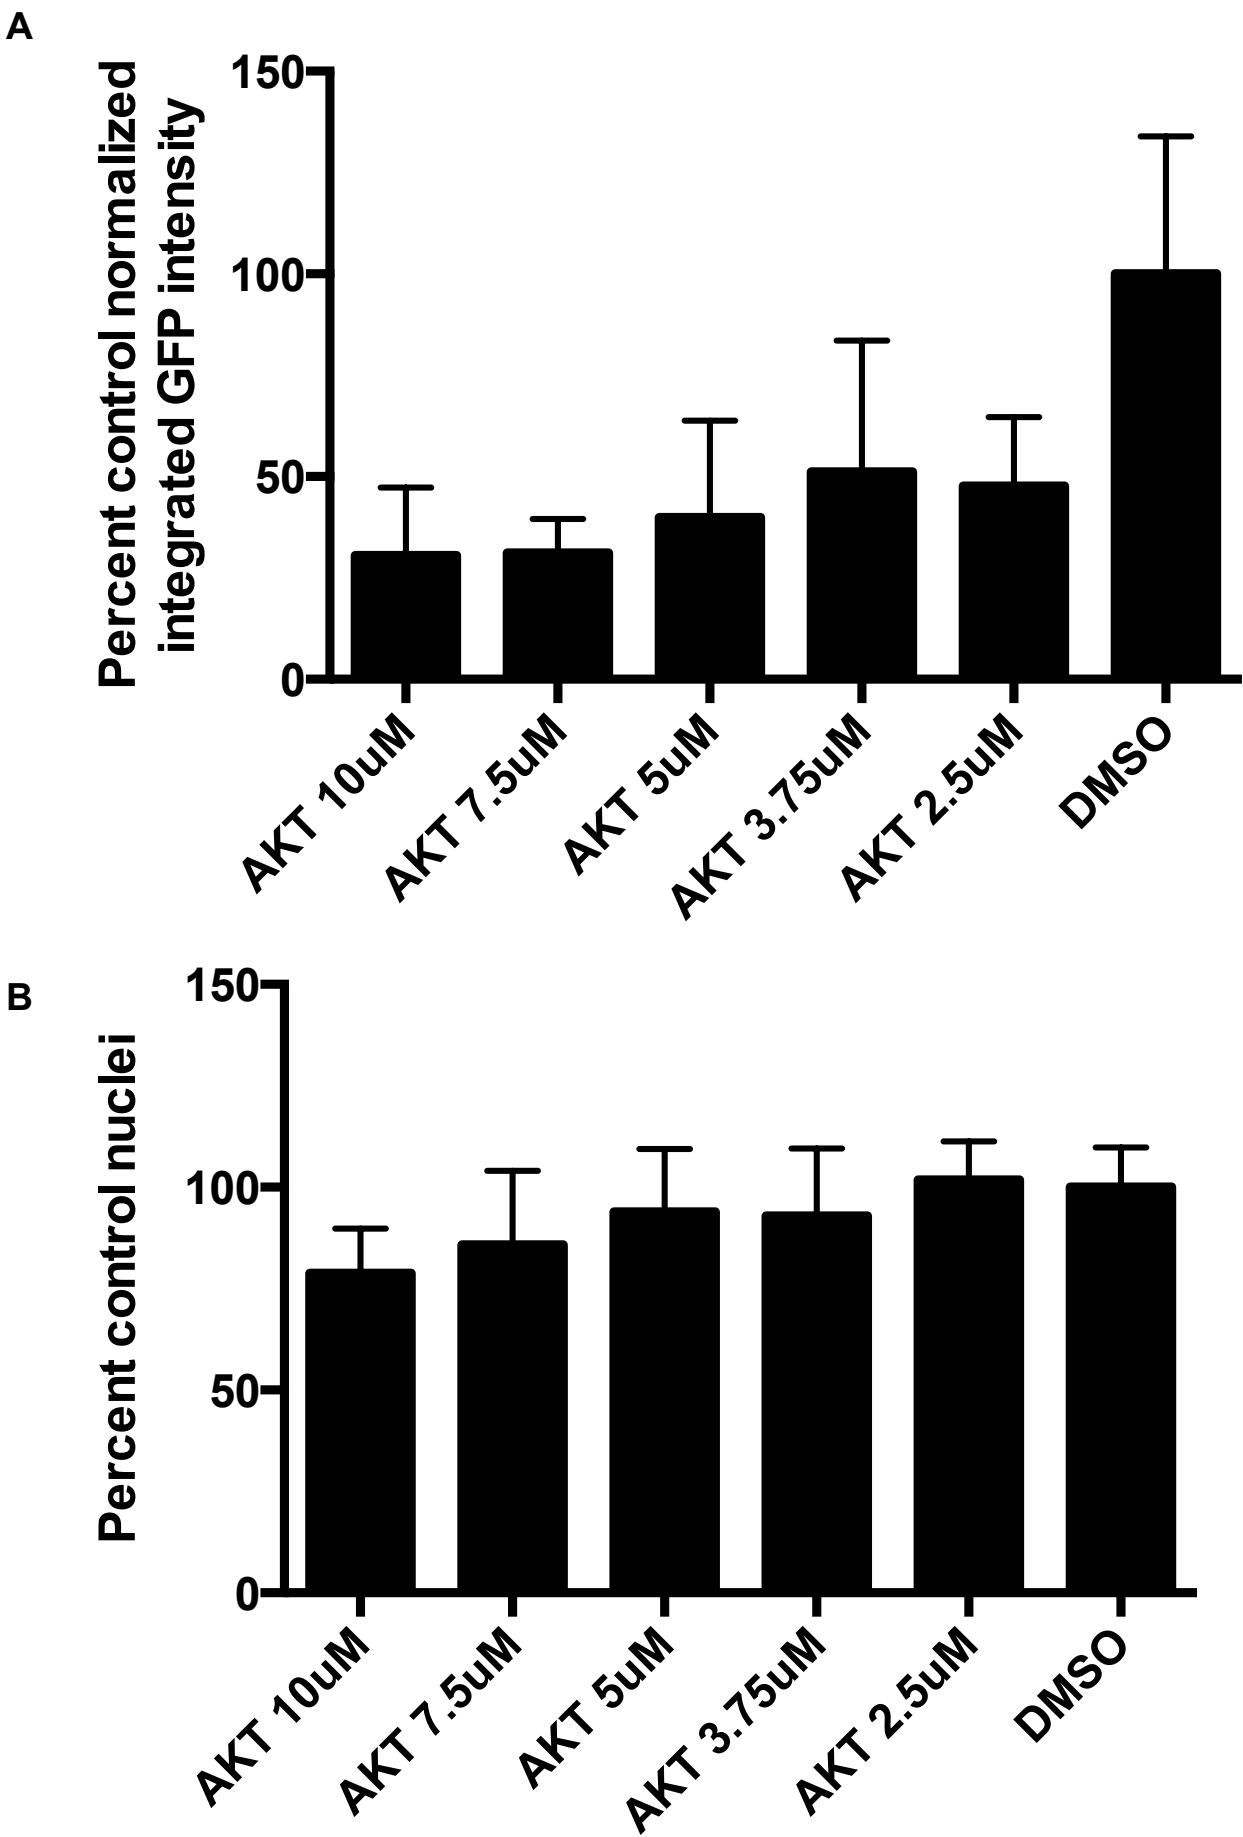

Supplement: S6 (10.1371/journal.ppat.1003946.s006) [file journal.ppat.1003946.s006]
